# Supplementary material for: Disentangling the oceanic drivers behind the post-2000 retreat of Sermeq Kujalleq, Greenland (Jakobshavn Isbræ)
Source: Copernicus journal article supplement (doi:10.5194/tc-19-1775-2025), 2025-05-08
Supplement: Supplementary file 1 [file tc-19-1775-2025-supplement.pdf]

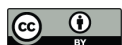

*Supplement of*

**Disentangling the oceanic drivers behind the post-2000 retreat of Sermeq Kujalleq, Greenland (Jakobshavn Isbræ)**

**Ziad Rashed et al.**

*Correspondence to:* Ziad Rashed (zrashed3@gatech.edu)

The copyright of individual parts of the supplement might differ from the article licence.

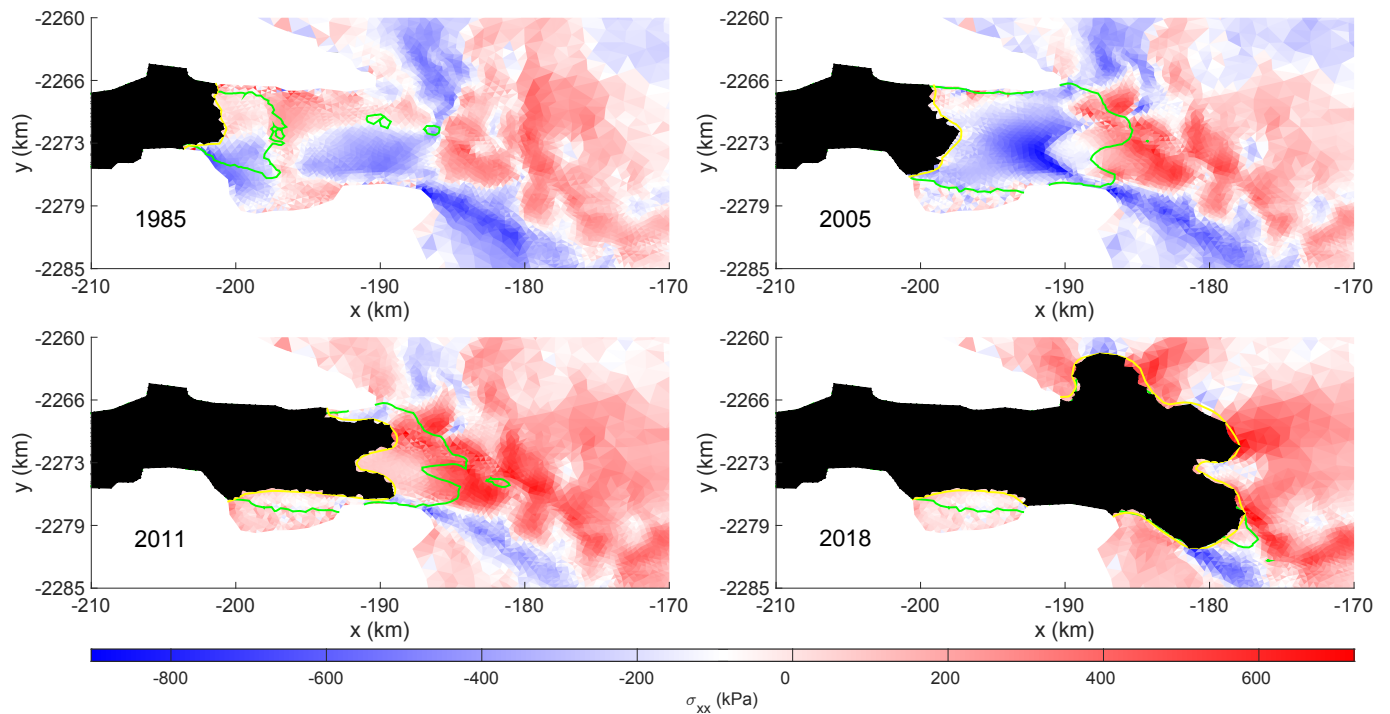

**Figure S1.**  $\sigma_{xx}$  state for best-fit model. The yellow line indicates the calving front and the green line indicates the grounding line. Panels indicate stress state and calving and grounding line positions at key points in time throughout our simulated period. 2005 marks the final removal of the ice tongue and 2011 is when calving fluxes begin to overtake submarine melt fluxes. By 2018, the calving front has receded to the grounding line.

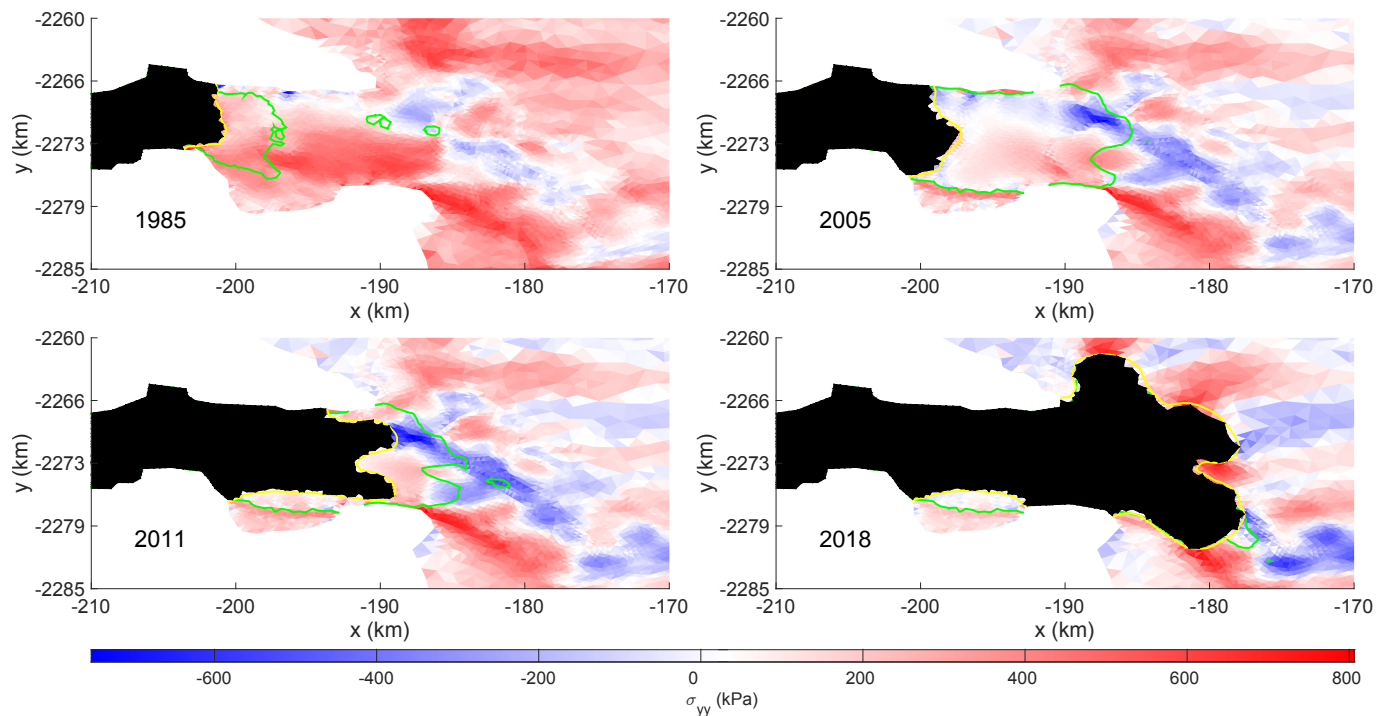

**Figure S2.**  $\sigma_{yy}$  state for best-fit model. The yellow line indicates the calving front and the green line indicates the grounding line. Panels indicate stress state and calving and grounding line positions at key points in time throughout our simulated period. 2005 marks the final removal of the ice tongue and 2011 is when calving fluxes begin to overtake submarine melt fluxes. By 2018, the calving front has receded to the grounding line.

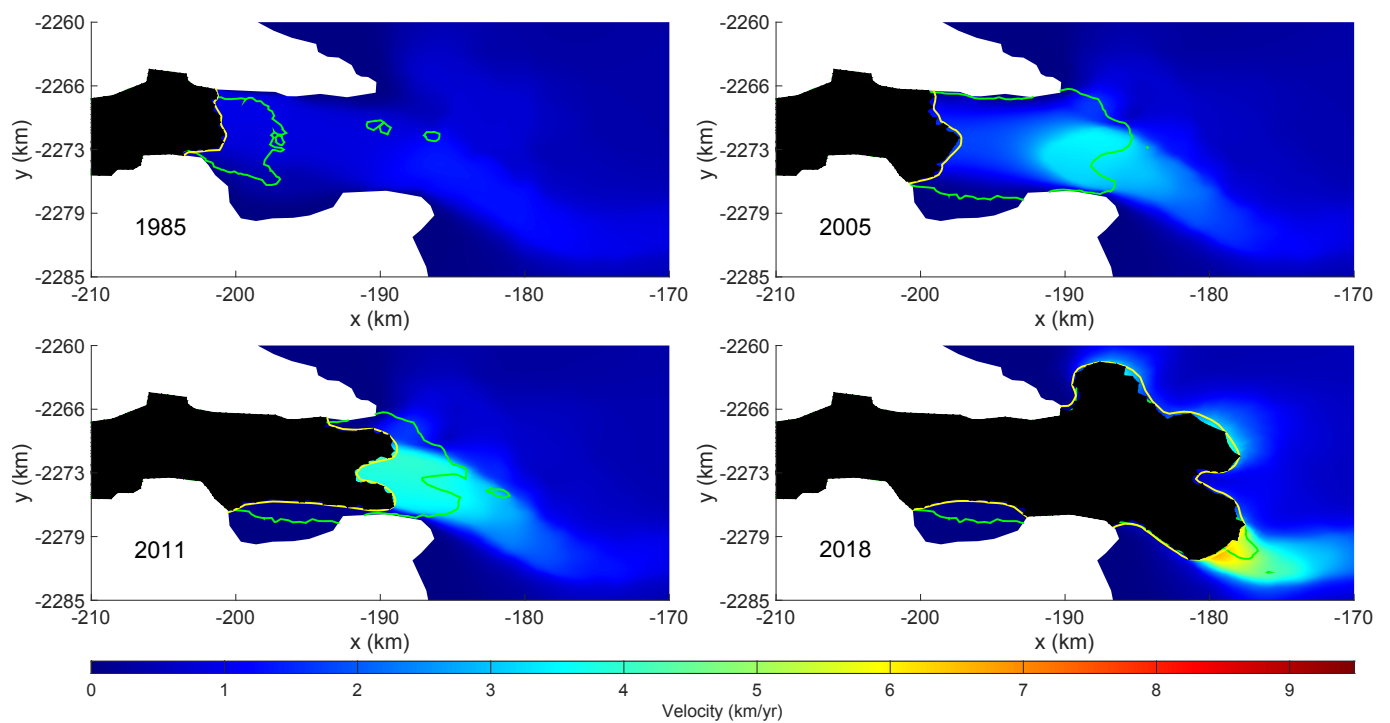

**Figure S3.** Magnitude of velocity for best-fit model. The yellow line indicates the calving front and the green line indicates the grounding line. Panels indicate velocity magnitudes at key points in time throughout our simulated period.
